# Supplementary material for: Globally consistent response of plant microbiome diversity across hosts and continents to soil nutrients and herbivores
Source: PubMed Central journal article supplement (PMC10267103; doi:10.1038/s41467-023-39179-w), 2023-06-14
Supplement: 41467_2023_39179_MOESM1_ESM.pdf [file 41467_2023_39179_MOESM1_ESM.pdf]

# Globally Consistent Response of Plant Microbiome Diversity Across Hosts and Continents to Soil Nutrients and Herbivores

Eric W. Seabloom, Maria C. Caldeira, Kendi F. Davies, Linda Kinkel, Johannes M. H. Knops, Kimberly J. Komatsu, Andrew MacDougall, Georgiana May, Michael Millican, Joslin L. Moore, Luis I. Perez, Anita J Porath-Krause, Sally A. Power, Suzanne M. Prober, Anita C. Risch, Carly Stevens, Elizabeth T. Borer

## Supplemental Material

**Figure S1.** Full meta-model used in SEM. Double-headed, dashed arrows indicate relationships modeled as correlated errors.

### Full Model

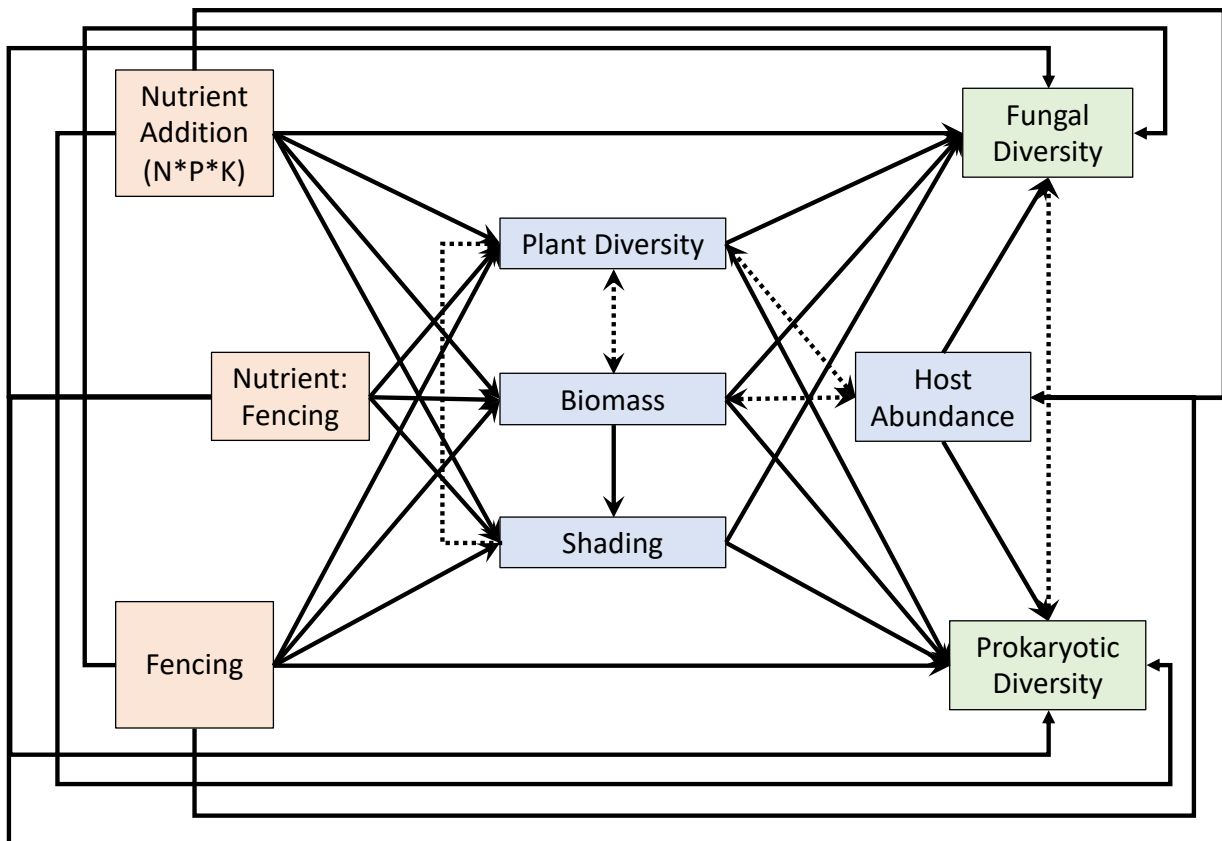

**Figure S2.** Full SEM (Model 1) with only significant links shown. Arrow width represents magnitude of standardized coefficients. Double-headed, dashed arrows indicate relationships modeled as correlated errors. Black arrows represent positive coefficients and orange arrows represent negative coefficients.

### Full Model (Fitted)

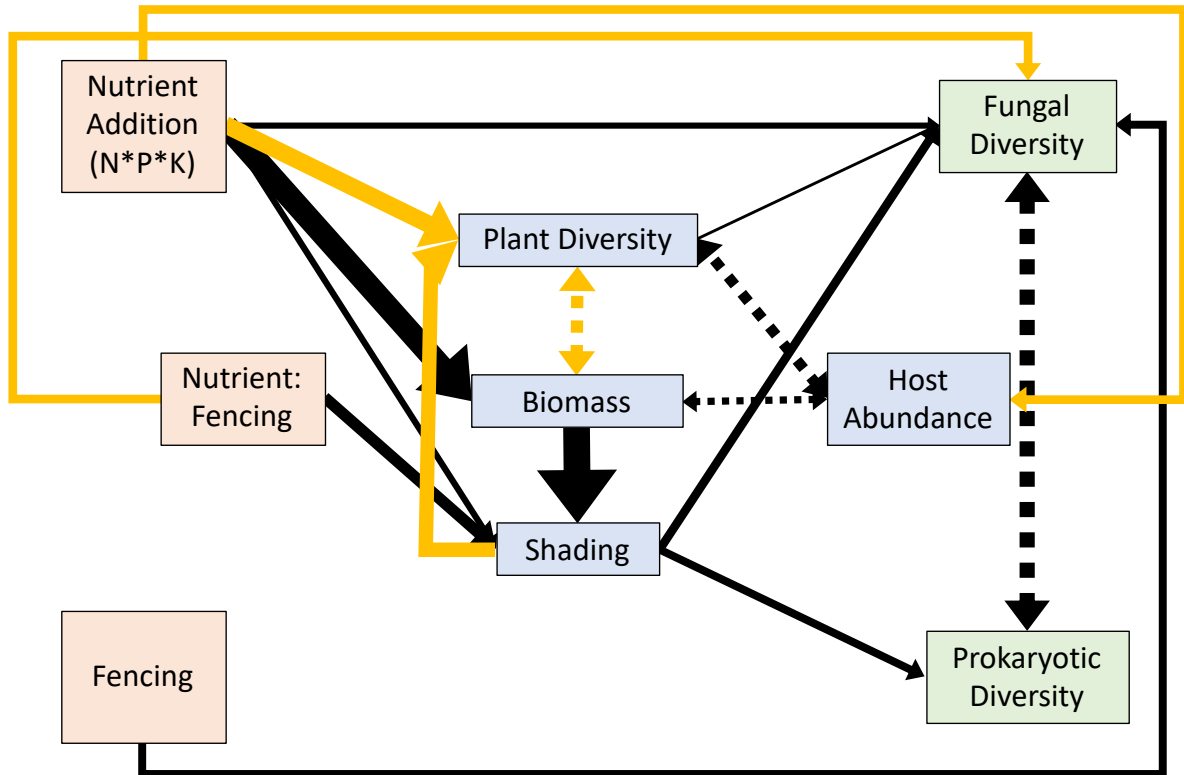

**Figure S3.** Plant-mediated SEM (Model 2) with only significant links shown. Arrow width represents magnitude of standardized coefficients. Double-headed, dashed arrows indicate relationships modeled as correlated errors. Black arrows represent positive coefficients and orange arrows represent negative coefficients.

### Plant Mediation Model (Fitted)

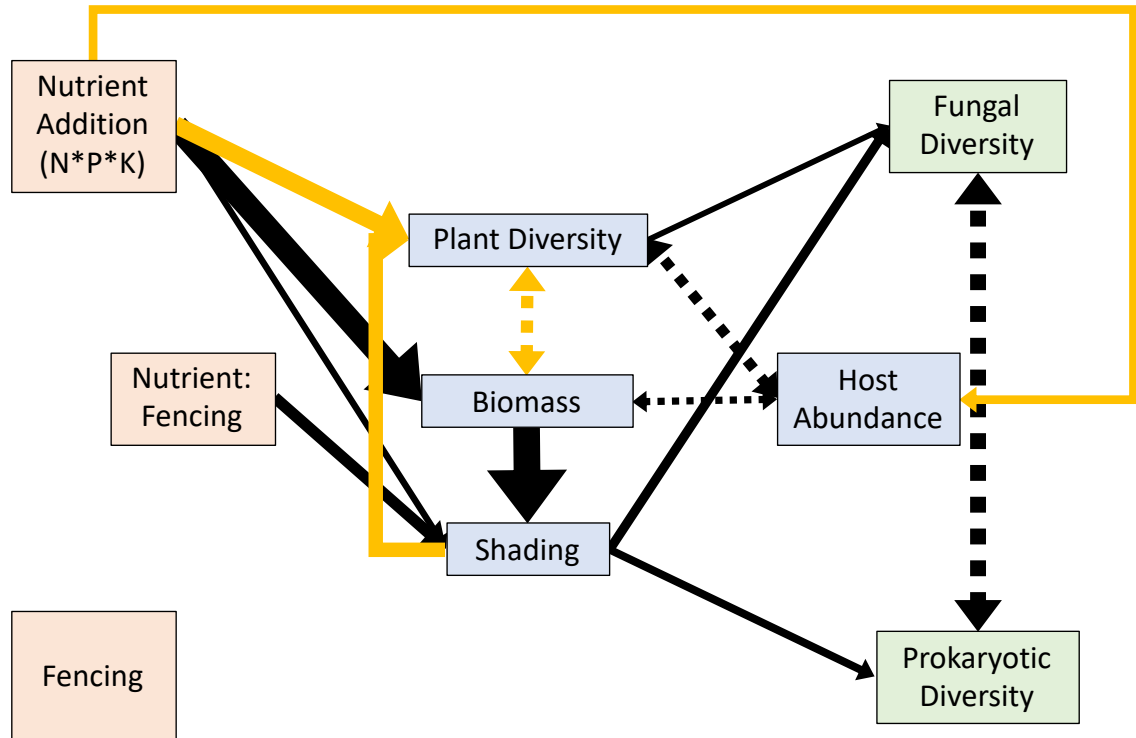



B.

### Bacterial & Archaea Abundance by Site

Color is Log10 Abundance (0 == 1%)

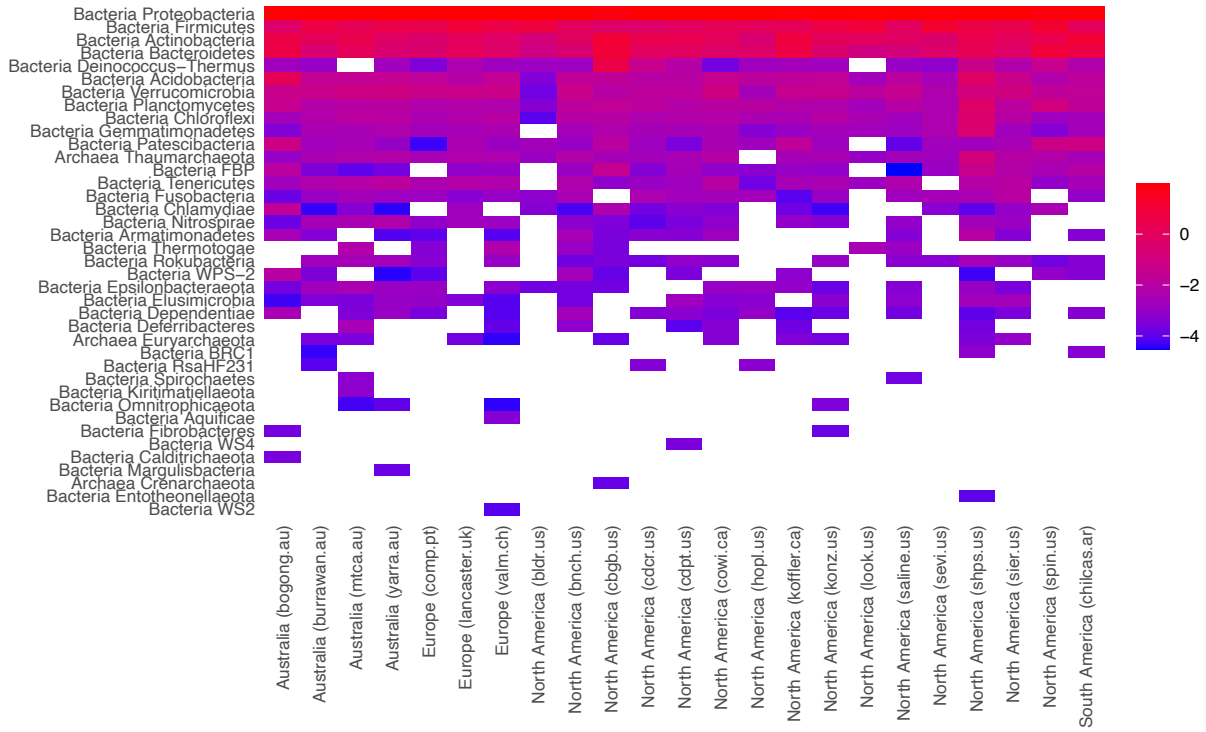

**Table S1.** Site characteristics, host species, and microbiome diversity.

| Site Code    | Continent     | Country        | Focal Host Species             | Mean Annual Rainfall (mm yr <sup>-1</sup> ) | Mean Annual Temperature (°C) | Live Biomass (log g m <sup>-2</sup> ) | Shade (Proportion) | Leaf-scale Fungal Diversity (ENS <sub>PIE</sub> ) | Leaf-scale Prokaryote Diversity (ENS <sub>PIE</sub> ) |
|--------------|---------------|----------------|--------------------------------|---------------------------------------------|------------------------------|---------------------------------------|--------------------|---------------------------------------------------|-------------------------------------------------------|
| bogong.au    | Australia     | Australia      | <i>Poa hiemata</i>             | 1678                                        | 6.0                          | 6.41                                  | 0.39               | 9.66                                              | 4.78                                                  |
| burrawan.au  | Australia     | Australia      | <i>Eragrostis curvula</i>      | 643                                         | 18.2                         | 5.88                                  | 0.63               | 9.93                                              | 2.32                                                  |
| mtca.au      | Australia     | Australia      | <i>Austrostipa nitida</i>      | 324                                         | 17.7                         | 6.02                                  | 0.65               | 6.00                                              | 2.08                                                  |
| yarra.au     | Australia     | Australia      | <i>Setaria parviflora</i>      | 844                                         | 17.3                         | 6.33                                  | NA                 | 4.77                                              | 1.62                                                  |
| valm.ch      | Europe        | Switzerland    | <i>Festuca rubra</i>           | 681                                         | 0.1                          | 5.52                                  | NA                 | 4.42                                              | 1.76                                                  |
| comp.pt      | Europe        | Portugal       | <i>Avena barbata</i>           | 564                                         | 16.6                         | 6.36                                  | 0.64               | 6.28                                              | 2.56                                                  |
| lancaster.uk | Europe        | United Kingdom | <i>Holcus lanatus</i>          | 1522                                        | 8.0                          | 5.40                                  | 0.39               | 4.03                                              | 2.23                                                  |
| cowi.ca      | North America | Canada         | <i>Aleopecurus pratensis</i>   | 762                                         | 10.4                         | 6.17                                  | 0.92               | 8.17                                              | 2.37                                                  |
| koffler.ca   | North America | Canada         | <i>Bromus inermis</i>          | 853                                         | 6.3                          | 6.58                                  | 0.93               | 16.61                                             | 11.51                                                 |
| bldr.us      | North America | United States  | <i>Sporobolus airoides</i>     | 487                                         | 9.9                          | 5.02                                  | NA                 | 2.90                                              | 1.87                                                  |
| bnch.us      | North America | United States  | <i>Bromus carinatus</i>        | 1618                                        | 6.8                          | 5.46                                  | 0.83               | 2.69                                              | 3.61                                                  |
| cbgb.us      | North America | United States  | <i>Schizachyrium scoparium</i> | 871                                         | 9.3                          | 6.68                                  | 0.91               | 25.33                                             | 24.93                                                 |
| cdcr.us      | North America | United States  | <i>Andropogon gerardii</i>     | 740                                         | 6.3                          | 5.60                                  | 0.86               | 5.07                                              | 3.15                                                  |
| cdpt.us      | North America | United States  | <i>Stipa comata</i>            | 456                                         | 9.6                          | 5.68                                  | 0.72               | 13.33                                             | 4.33                                                  |
| hopl.us      | North America | United States  | <i>Bromus hordeaceus</i>       | 1065                                        | 13.2                         | 5.50                                  | 0.85               | 4.82                                              | 2.96                                                  |
| konz.us      | North America | United States  | <i>Andropogon gerardii</i>     | 889                                         | 12.1                         | 6.70                                  | NA                 | 5.22                                              | 3.17                                                  |
| look.us      | North America | United States  | <i>Bromus carinatus</i>        | 1877                                        | 6.9                          | 4.76                                  | 0.59               | 4.74                                              | 5.10                                                  |
| saline.us    | North America | United States  | <i>Andropogon gerardii</i>     | 608                                         | 12.1                         | 5.80                                  | 0.58               | 6.26                                              | 2.47                                                  |
| sevi.us      | North America | United States  | <i>Bouteloua eriopoda</i>      | 252                                         | 13.1                         | 4.98                                  | NA                 | 4.64                                              | 1.55                                                  |
| shps.us      | North America | United States  | <i>Pseudoroegneria spicata</i> | 246                                         | 5.3                          | NA                                    | NA                 | 5.93                                              | 3.44                                                  |
| sier.us      | North America | United States  | <i>Bromus hordeaceus</i>       | 936                                         | 16.3                         | 5.47                                  | 0.90               | 4.69                                              | 3.40                                                  |
| spin.us      | North America | United States  | <i>Poa pratensis</i>           | 1152                                        | 12.5                         | 6.21                                  | 0.91               | 13.98                                             | 9.61                                                  |
| chilcas.ar   | South America | Argentina      | <i>Schenodorus phoenix</i>     | 955                                         | 15.1                         | 6.70                                  | 0.85               | 10.01                                             | 11.60                                                 |

**Table S2.** Drivers of population-scale fungal and prokaryotic (bacteria and archaea) diversity. Models are shown for the full set of 22 sites with all covariates, the subset of 17 sites at which we measured shading, and the subset of 14 sites at which we also measured soil chemistry. Results are based on multi-model inference from a suite of mixed effects models. The importance of the parameter is the sum of the Akaike weights summed across the set of models within 4 AICc units of the top model (lowest AICc) in which a parameter is included. Importance ranges from 0 (parameter has no explanatory weight) to 1 (parameter is in all top models). All tests are two-tailed.

| Data Set    | Response             | Type of Averaging   | Predictor            | Estimate     | Standard Error | z             | p            | Number of Models | Importance   |
|-------------|----------------------|---------------------|----------------------|--------------|----------------|---------------|--------------|------------------|--------------|
| All Sites   | Fungi                | Full                | <b>Intercept</b>     | <b>2.384</b> | <b>0.136</b>   | <b>16.426</b> | <b>0.000</b> |                  |              |
|             |                      |                     | <b>Plant Biomass</b> | <b>0.934</b> | <b>0.282</b>   | <b>3.103</b>  | <b>0.002</b> | <b>7.000</b>     | <b>1.000</b> |
|             |                      |                     | Plant Diversity      | -0.062       | 0.208          | 0.288         | 0.773        | 2.000            | 0.188        |
|             |                      |                     | Host Abundance       | -0.045       | 0.192          | 0.224         | 0.823        | 2.000            | 0.164        |
|             |                      |                     | Site Plant Richness  | -0.007       | 0.092          | 0.074         | 0.941        | 1.000            | 0.098        |
|             |                      |                     | Precipitation        | 0.002        | 0.087          | 0.018         | 0.986        | 1.000            | 0.094        |
|             |                      |                     | Temperature          | -0.001       | 0.089          | 0.011         | 0.991        | 1.000            | 0.094        |
|             |                      | Conditional         | <b>Intercept</b>     | <b>2.384</b> | <b>0.136</b>   | <b>16.426</b> | <b>0.000</b> |                  |              |
|             | <b>Plant Biomass</b> |                     | <b>0.934</b>         | <b>0.282</b> | <b>3.103</b>   | <b>0.002</b>  | <b>7.000</b> | <b>1.000</b>     |              |
|             | Plant Diversity      |                     | -0.330               | 0.377        | 0.830          | 0.407         | 2.000        | 0.188            |              |
|             | Host Abundance       |                     | -0.272               | 0.405        | 0.640          | 0.522         | 2.000        | 0.164            |              |
|             | Site Plant Richness  |                     | -0.074               | 0.286        | 0.243          | 0.808         | 1.000        | 0.098            |              |
|             | Precipitation        |                     | 0.018                | 0.284        | 0.059          | 0.953         | 1.000        | 0.094            |              |
|             | Temperature          |                     | -0.011               | 0.290        | 0.036          | 0.972         | 1.000        | 0.094            |              |
| Prokaryotes | Full                 | <b>Intercept</b>    | <b>1.313</b>         | <b>0.171</b> | <b>7.201</b>   | <b>0.000</b>  |              |                  |              |
|             |                      | Plant Biomass       | 0.490                | 0.468        | 1.019          | 0.308         | 17.000       | 0.661            |              |
|             |                      | Temperature         | -0.289               | 0.424        | 0.666          | 0.505         | 12.000       | 0.438            |              |
|             |                      | Precipitation       | 0.192                | 0.338        | 0.552          | 0.581         | 12.000       | 0.360            |              |
|             |                      | Plant Diversity     | -0.077               | 0.333        | 0.227          | 0.820         | 10.000       | 0.312            |              |
|             |                      | Host Abundance      | -0.206               | 0.441        | 0.458          | 0.647         | 7.000        | 0.178            |              |
|             |                      | Site Plant Richness | 0.002                | 0.145        | 0.013          | 0.989         | 6.000        | 0.113            |              |
|             |                      | Conditional         | <b>Intercept</b>     | <b>1.313</b> | <b>0.171</b>   | <b>7.201</b>  | <b>0.000</b> |                  |              |
|             | Plant Biomass        |                     | 0.742                | 0.381        | 1.837          | 0.066         | 17.000       | 0.661            |              |
|             | Temperature          |                     | -0.659               | 0.407        | 1.533          | 0.125         | 12.000       | 0.438            |              |
|             | Precipitation        |                     | 0.532                | 0.368        | 1.358          | 0.175         | 12.000       | 0.360            |              |
|             | Plant Diversity      |                     | -0.436               | 0.684        | 0.617          | 0.537         | 10.000       | 0.312            |              |
|             | Host Abundance       |                     | -0.661               | 0.568        | 1.119          | 0.263         | 7.000        | 0.178            |              |
|             | Site Plant Richness  |                     | 0.018                | 0.432        | 0.040          | 0.968         | 6.000        | 0.113            |              |

| Data Set            | Response | Type of Averaging   | Predictor                    | Estimate         | Standard Error | z             | p            | Number of Models | Importance   |
|---------------------|----------|---------------------|------------------------------|------------------|----------------|---------------|--------------|------------------|--------------|
| Light Sites         | Fungi    | Full                | <b>Intercept</b>             | <b>2.584</b>     | <b>0.134</b>   | <b>17.700</b> | <b>0.000</b> |                  |              |
|                     |          |                     | <b>Plant Biomass</b>         | <b>1.053</b>     | <b>0.283</b>   | <b>3.410</b>  | <b>0.001</b> | <b>7.000</b>     | <b>1.000</b> |
|                     |          |                     | Temperature                  | -0.022           | 0.112          | 0.186         | 0.852        | 1.000            | 0.111        |
|                     |          |                     | Shading                      | -0.012           | 0.095          | 0.114         | 0.909        | 1.000            | 0.092        |
|                     |          |                     | Potential Evapotranspiration | -0.006           | 0.085          | 0.068         | 0.946        | 1.000            | 0.085        |
|                     |          |                     | Host Abundance               | -0.003           | 0.090          | 0.026         | 0.979        | 1.000            | 0.082        |
|                     |          |                     | Precipitation                | -0.000           | 0.087          | 0.004         | 0.997        | 1.000            | 0.082        |
|                     |          |                     | Site Plant Richness          | -0.000           | 0.083          | 0.000         | 1.000        | 1.000            | 0.082        |
|                     |          | Conditional         | <b>Intercept</b>             | <b>2.584</b>     | <b>0.134</b>   | <b>17.700</b> | <b>0.000</b> |                  |              |
|                     |          |                     | <b>Plant Biomass</b>         | <b>1.053</b>     | <b>0.283</b>   | <b>3.410</b>  | <b>0.001</b> | <b>7.000</b>     | <b>1.000</b> |
|                     |          |                     | Temperature                  | -0.201           | 0.280          | 0.656         | 0.512        | 1.000            | 0.111        |
|                     |          |                     | Shading                      | -0.128           | 0.289          | 0.405         | 0.686        | 1.000            | 0.092        |
|                     |          |                     | Potential Evapotranspiration | -0.073           | 0.282          | 0.238         | 0.812        | 1.000            | 0.085        |
|                     |          |                     | Host Abundance               | -0.032           | 0.314          | 0.092         | 0.927        | 1.000            | 0.082        |
|                     |          |                     | Precipitation                | -0.004           | 0.303          | 0.012         | 0.990        | 1.000            | 0.082        |
| Site Plant Richness | -0.000   | 0.289               | 0.001                        | 0.999            | 1.000          | 0.082         |              |                  |              |
| Prokaryotes         | Full     | Full                | <b>Intercept</b>             | <b>1.497</b>     | <b>0.199</b>   | <b>6.889</b>  | <b>0.000</b> |                  |              |
|                     |          |                     | Shading                      | 0.347            | 0.462          | 0.726         | 0.468        | 9.000            | 0.478        |
|                     |          |                     | Temperature                  | -0.258           | 0.418          | 0.597         | 0.550        | 7.000            | 0.374        |
|                     |          |                     | Plant Biomass                | 0.209            | 0.390          | 0.517         | 0.605        | 7.000            | 0.328        |
|                     |          |                     | Precipitation                | 0.123            | 0.321          | 0.370         | 0.712        | 5.000            | 0.209        |
|                     |          |                     | Host Abundance               | -0.009           | 0.136          | 0.062         | 0.951        | 3.000            | 0.068        |
|                     |          |                     | Site Plant Richness          | 0.001            | 0.118          | 0.011         | 0.991        | 3.000            | 0.066        |
|                     |          |                     | Conditional                  | <b>Intercept</b> | <b>1.497</b>   | <b>0.199</b>  | <b>6.889</b> | <b>0.000</b>     |              |
|                     |          | Shading             |                              | 0.726            | 0.413          | 1.612         | 0.107        | 9.000            | 0.478        |
|                     |          | Temperature         |                              | -0.690           | 0.411          | 1.537         | 0.124        | 7.000            | 0.374        |
|                     |          | Plant Biomass       |                              | 0.637            | 0.437          | 1.340         | 0.180        | 7.000            | 0.328        |
|                     |          | Precipitation       |                              | 0.588            | 0.467          | 1.164         | 0.244        | 5.000            | 0.209        |
|                     |          | Host Abundance      |                              | -0.132           | 0.506          | 0.243         | 0.808        | 3.000            | 0.068        |
|                     |          | Site Plant Richness |                              | 0.022            | 0.461          | 0.043         | 0.965        | 3.000            | 0.066        |



| Data Set            | Response                     | Type of Averaging | Predictor                    | Estimate      | Standard Error   | z             | p             | Number of Models | Importance   |
|---------------------|------------------------------|-------------------|------------------------------|---------------|------------------|---------------|---------------|------------------|--------------|
| Soil Sites          | Fungi                        | Full              | <b>Intercept</b>             | <b>2.681</b>  | <b>0.156</b>     | <b>15.331</b> | <b>0.000</b>  |                  |              |
|                     |                              |                   | <b>Plant Biomass</b>         | <b>1.069</b>  | <b>0.339</b>     | <b>2.825</b>  | <b>0.005</b>  | <b>10.000</b>    | <b>1.000</b> |
|                     |                              |                   | Soil P                       | 0.093         | 0.232            | 0.383         | 0.702         | 1.000            | 0.194        |
|                     |                              |                   | Soil N                       | -0.020        | 0.118            | 0.154         | 0.878         | 1.000            | 0.070        |
|                     |                              |                   | Soil C:N                     | -0.013        | 0.105            | 0.113         | 0.910         | 1.000            | 0.059        |
|                     |                              |                   | Host Abundance               | -0.012        | 0.099            | 0.107         | 0.914         | 1.000            | 0.058        |
|                     |                              |                   | Shading                      | -0.010        | 0.091            | 0.096         | 0.924         | 1.000            | 0.056        |
|                     |                              |                   | Precipitation                | -0.009        | 0.093            | 0.086         | 0.931         | 1.000            | 0.054        |
|                     |                              |                   | Temperature                  | -0.006        | 0.081            | 0.064         | 0.949         | 1.000            | 0.051        |
|                     |                              |                   | Site Plant Richness          | 0.005         | 0.082            | 0.053         | 0.958         | 1.000            | 0.050        |
|                     |                              |                   | Potential Evapotranspiration | 0.004         | 0.079            | 0.051         | 0.960         | 1.000            | 0.050        |
|                     |                              |                   |                              | Conditional   | <b>Intercept</b> | <b>2.681</b>  | <b>0.156</b>  | <b>15.331</b>    | <b>0.000</b> |
|                     | <b>Plant Biomass</b>         | <b>1.069</b>      | <b>0.339</b>                 |               | <b>2.825</b>     | <b>0.005</b>  | <b>10.000</b> | <b>1.000</b>     |              |
|                     | Soil P                       | 0.478             | 0.305                        |               | 1.393            | 0.164         | 1.000         | 0.194            |              |
|                     | Soil N                       | -0.281            | 0.356                        |               | 0.702            | 0.482         | 1.000         | 0.070            |              |
|                     | Soil C:N                     | -0.219            | 0.375                        |               | 0.520            | 0.603         | 1.000         | 0.059            |              |
|                     | Host Abundance               | -0.203            | 0.364                        |               | 0.496            | 0.620         | 1.000         | 0.058            |              |
|                     | Shading                      | -0.173            | 0.349                        |               | 0.442            | 0.658         | 1.000         | 0.056            |              |
|                     | Precipitation                | -0.165            | 0.368                        |               | 0.399            | 0.690         | 1.000         | 0.054            |              |
|                     | Temperature                  | -0.113            | 0.342                        |               | 0.293            | 0.769         | 1.000         | 0.051            |              |
|                     | Site Plant Richness          | 0.096             | 0.353                        |               | 0.243            | 0.808         | 1.000         | 0.050            |              |
|                     | Potential Evapotranspiration | 0.089             | 0.342                        |               | 0.233            | 0.816         | 1.000         | 0.050            |              |
|                     | Prokaryotes                  | Full              | <b>Intercept</b>             |               | <b>1.623</b>     | <b>0.179</b>  | <b>8.087</b>  | <b>0.000</b>     |              |
|                     |                              |                   | <b>Soil C:N</b>              | <b>-1.168</b> | <b>0.490</b>     | <b>2.217</b>  | <b>0.027</b>  | <b>7.000</b>     | <b>0.952</b> |
| Temperature         |                              |                   | -0.359                       | 0.448         | 0.769            | 0.442         | 3.000         | 0.480            |              |
| Soil P              |                              |                   | 0.184                        | 0.367         | 0.482            | 0.630         | 3.000         | 0.283            |              |
| Site Plant Richness |                              |                   | -0.028                       | 0.154         | 0.172            | 0.864         | 1.000         | 0.059            |              |
| Precipitation       |                              |                   | 0.026                        | 0.143         | 0.169            | 0.865         | 1.000         | 0.058            |              |
|                     |                              | Conditional       | <b>Intercept</b>             | <b>1.623</b>  | <b>0.179</b>     | <b>8.087</b>  | <b>0.000</b>  |                  |              |
| <b>Soil C:N</b>     |                              |                   | <b>-1.227</b>                | <b>0.424</b>  | <b>2.618</b>     | <b>0.009</b>  | <b>7.000</b>  | <b>0.952</b>     |              |
| Temperature         |                              |                   | -0.748                       | 0.358         | 1.858            | 0.063         | 3.000         | 0.480            |              |
| Soil P              |                              |                   | 0.651                        | 0.415         | 1.414            | 0.157         | 3.000         | 0.283            |              |
| Site Plant Richness |                              |                   | -0.479                       | 0.436         | 0.978            | 0.328         | 1.000         | 0.059            |              |
| Shading             |                              |                   | -0.510                       | 0.522         | 0.859            | 0.390         | 1.000         | 0.051            |              |

**Table S3.** Drivers of leaf-scale fungal and prokaryotic (bacteria and archaea) diversity. Models are shown for the full set of 22 sites with all covariates, the subset of 17 sites at which we measured shading, and the subset of 14 sites at which we also measured soil chemistry. Results are based on multi-model inference from a suite of mixed effects models. The importance of the parameter is the sum of the Akaike weights summed across the set of models within 4 AICc units of the top model (lowest AICc) in which a parameter is included. Importance ranges from 0 (parameter has no explanatory weight) to 1 (parameter is in all top models). All tests are two tailed.

| Data Set  | Response    | Type of Averaging | Predictor             | Estimate                   | Standard Error | z             | p             | Number of Models | Importance    |              |
|-----------|-------------|-------------------|-----------------------|----------------------------|----------------|---------------|---------------|------------------|---------------|--------------|
| All Sites | Fungi       | Full              | Intercept             | <b>1.789</b>               | <b>0.054</b>   | <b>32.695</b> | <b>0.000</b>  |                  |               |              |
|           |             |                   | Pop. Fungal Diversity | <b>1.134</b>               | <b>0.109</b>   | <b>10.292</b> | <b>0.000</b>  | <b>7.000</b>     | <b>1.000</b>  |              |
|           |             |                   | Temperature           | -0.007                     | 0.048          | 0.151         | 0.880         | 2.000            | 0.174         |              |
|           |             |                   | Plant Diversity       | 0.006                      | 0.039          | 0.144         | 0.885         | 2.000            | 0.173         |              |
|           |             |                   | Host Abundance        | -0.003                     | 0.030          | 0.090         | 0.928         | 1.000            | 0.123         |              |
|           |             |                   | Plant Biomass         | 0.002                      | 0.031          | 0.052         | 0.958         | 1.000            | 0.120         |              |
|           |             |                   | Precipitation         | 0.000                      | 0.036          | 0.001         | 0.999         | 1.000            | 0.118         |              |
|           | Prokaryotes | Full              | Conditional           | Intercept                  | <b>1.789</b>   | <b>0.054</b>  | <b>32.695</b> | <b>0.000</b>     |               |              |
|           |             |                   |                       | Pop. Prokaryotic Diversity | <b>1.134</b>   | <b>0.109</b>  | <b>10.292</b> | <b>0.000</b>     | <b>7.000</b>  | <b>1.000</b> |
|           |             |                   |                       | Temperature                | -0.042         | 0.108         | 0.382         | 0.702            | 2.000         | 0.174        |
|           |             |                   |                       | Plant Diversity            | 0.033          | 0.090         | 0.366         | 0.714            | 2.000         | 0.173        |
|           |             |                   |                       | Host Abundance             | -0.022         | 0.082         | 0.265         | 0.791            | 1.000         | 0.123        |
|           |             |                   |                       | Plant Biomass              | 0.014          | 0.089         | 0.152         | 0.879            | 1.000         | 0.120        |
|           |             |                   |                       | Precipitation              | 0.000          | 0.104         | 0.002         | 0.998            | 1.000         | 0.118        |
| All Sites | Fungi       | Full              | Intercept             | <b>1.149</b>               | <b>0.051</b>   | <b>22.335</b> | <b>0.000</b>  |                  |               |              |
|           |             |                   | Pop. Fungal Diversity | <b>1.293</b>               | <b>0.114</b>   | <b>11.260</b> | <b>0.000</b>  | <b>11.000</b>    | <b>1.000</b>  |              |
|           |             |                   | Plant Diversity       | -0.078                     | 0.103          | 0.756         | 0.450         | 11.000           | 1.000         |              |
|           |             |                   | Host Abundance        | -0.159                     | 0.110          | 1.434         | 0.151         | 7.000            | 0.812         |              |
|           |             |                   | Plant Biomass         | 0.291                      | 0.090          | 3.210         | 0.001         | 5.000            | 0.516         |              |
|           |             |                   | Precipitation         | -0.020                     | 0.064          | 0.319         | 0.750         | 4.000            | 0.261         |              |
|           |             |                   | Temperature           | 0.019                      | 0.064          | 0.290         | 0.772         | 4.000            | 0.254         |              |
|           | Prokaryotes | Full              | Conditional           | Intercept                  | <b>1.149</b>   | <b>0.051</b>  | <b>22.335</b> | <b>0.000</b>     |               |              |
|           |             |                   |                       | Pop. Prokaryotic Diversity | <b>1.293</b>   | <b>0.114</b>  | <b>11.260</b> | <b>0.000</b>     | <b>11.000</b> | <b>1.000</b> |
|           |             |                   |                       | Plant Diversity            | -0.152         | 0.098         | 1.545         | 0.122            | 11.000        | 1.000        |
|           |             |                   |                       | Host Abundance             | -0.195         | 0.088         | 2.201         | 0.028            | 7.000         | 0.812        |
|           |             |                   |                       | Plant Biomass              | 0.291          | 0.090         | 3.210         | 0.001            | 5.000         | 0.516        |
|           |             |                   |                       | Precipitation              | -0.078         | 0.105         | 0.740         | 0.459            | 4.000         | 0.261        |
|           |             |                   |                       | Temperature                | 0.074          | 0.110         | 0.663         | 0.507            | 4.000         | 0.254        |

| Data Set      | Response      | Type of Averaging | Predictor                    | Estimate                          | Standard Error | z             | p             | Number of Models | Importance    |              |
|---------------|---------------|-------------------|------------------------------|-----------------------------------|----------------|---------------|---------------|------------------|---------------|--------------|
| Light Sites   | Fungi         | Full              | <b>Intercept</b>             | <b>1.916</b>                      | <b>0.063</b>   | <b>30.157</b> | <b>0.000</b>  |                  |               |              |
|               |               |                   | <b>Pop. Fungal Diversity</b> | <b>1.153</b>                      | <b>0.128</b>   | <b>8.964</b>  | <b>0.000</b>  | <b>16.000</b>    | <b>1.000</b>  |              |
|               |               |                   | Shading                      | 0.026                             | 0.069          | 0.370         | 0.712         | 6.000            | 0.280         |              |
|               |               |                   | Plant Diversity              | 0.014                             | 0.052          | 0.274         | 0.784         | 6.000            | 0.246         |              |
|               |               |                   | Plant Biomass                | -0.008                            | 0.043          | 0.179         | 0.858         | 3.000            | 0.155         |              |
|               |               |                   | Host Abundance               | -0.002                            | 0.033          | 0.059         | 0.953         | 3.000            | 0.138         |              |
|               |               |                   | Precipitation                | 0.003                             | 0.046          | 0.069         | 0.945         | 3.000            | 0.137         |              |
|               |               | Temperature       | 0.001                        | 0.047                             | 0.021          | 0.983         | 3.000         | 0.136            |               |              |
|               |               | Conditional       | <b>Intercept</b>             | <b>1.916</b>                      | <b>0.063</b>   | <b>30.157</b> | <b>0.000</b>  |                  |               |              |
|               |               |                   | <b>Pop. Fungal Diversity</b> | <b>1.153</b>                      | <b>0.128</b>   | <b>8.964</b>  | <b>0.000</b>  | <b>16.000</b>    | <b>1.000</b>  |              |
|               |               |                   | Shading                      | 0.092                             | 0.104          | 0.869         | 0.385         | 6.000            | 0.280         |              |
|               |               |                   | Plant Diversity              | 0.058                             | 0.092          | 0.630         | 0.529         | 6.000            | 0.246         |              |
|               |               |                   | Plant Biomass                | -0.051                            | 0.100          | 0.500         | 0.617         | 3.000            | 0.155         |              |
|               |               |                   | Host Abundance               | -0.014                            | 0.088          | 0.161         | 0.872         | 3.000            | 0.138         |              |
|               | Precipitation |                   | 0.023                        | 0.123                             | 0.190          | 0.849         | 3.000         | 0.137            |               |              |
|               | Prokaryotes   | Full              | Full                         | <b>Intercept</b>                  | <b>1.305</b>   | <b>0.060</b>  | <b>21.545</b> | <b>0.000</b>     |               |              |
|               |               |                   |                              | <b>Pop. Prokaryotic Diversity</b> | <b>1.326</b>   | <b>0.132</b>  | <b>9.999</b>  | <b>0.000</b>     | <b>11.000</b> | <b>1.000</b> |
|               |               |                   |                              | <b>Host Abundance</b>             | <b>-0.231</b>  | <b>0.108</b>  | <b>2.133</b>  | <b>0.033</b>     | <b>11.000</b> | <b>1.000</b> |
|               |               |                   |                              | <b>Plant Biomass</b>              | <b>0.418</b>   | <b>0.105</b>  | <b>3.947</b>  | <b>0.000</b>     | <b>10.000</b> | <b>0.956</b> |
|               |               |                   |                              | Plant Diversity                   | -0.043         | 0.084         | 0.512         | 0.609            | 4.000         | 0.354        |
|               |               |                   |                              | Temperature                       | 0.022          | 0.079         | 0.278         | 0.781            | 4.000         | 0.244        |
|               |               |                   |                              | Shading                           | 0.009          | 0.055         | 0.165         | 0.869            | 3.000         | 0.187        |
|               |               | Precipitation     | 0.005                        | 0.055                             | 0.090          | 0.928         | 3.000         | 0.179            |               |              |
|               |               | Conditional       | Full                         | <b>Intercept</b>                  | <b>1.305</b>   | <b>0.060</b>  | <b>21.545</b> | <b>0.000</b>     |               |              |
|               |               |                   |                              | <b>Pop. Prokaryotic Diversity</b> | <b>1.326</b>   | <b>0.132</b>  | <b>9.999</b>  | <b>0.000</b>     | <b>11.000</b> | <b>1.000</b> |
|               |               |                   |                              | <b>Host Abundance</b>             | <b>-0.242</b>  | <b>0.098</b>  | <b>2.451</b>  | <b>0.014</b>     | <b>11.000</b> | <b>1.000</b> |
|               |               |                   |                              | <b>Plant Biomass</b>              | <b>0.418</b>   | <b>0.105</b>  | <b>3.947</b>  | <b>0.000</b>     | <b>10.000</b> | <b>0.956</b> |
|               |               |                   |                              | Plant Diversity                   | -0.122         | 0.102         | 1.188         | 0.235            | 4.000         | 0.354        |
| Temperature   |               |                   |                              | 0.091                             | 0.140          | 0.646         | 0.518         | 4.000            | 0.244         |              |
| Shading       | 0.049         |                   |                              | 0.120                             | 0.406          | 0.685         | 3.000         | 0.187            |               |              |
| Precipitation | 0.028         | 0.128             | 0.217                        | 0.828                             | 3.000          | 0.179         |               |                  |               |              |

| Data Set                          | Response        | Type of Averaging | Predictor                         | Estimate      | Standard Error   | z             | p             | Number of Models | Importance    |              |  |
|-----------------------------------|-----------------|-------------------|-----------------------------------|---------------|------------------|---------------|---------------|------------------|---------------|--------------|--|
| Soil Sites                        | Fungi           | Full              | <b>Intercept</b>                  | <b>2.001</b>  | <b>0.065</b>     | <b>30.506</b> | <b>0.000</b>  |                  |               |              |  |
|                                   |                 |                   | <b>Pop. Fungal Diversity</b>      | <b>1.211</b>  | <b>0.142</b>     | <b>8.428</b>  | <b>0.000</b>  | <b>78.000</b>    | <b>1.000</b>  |              |  |
|                                   |                 |                   | Soil C:N                          | -0.050        | 0.094            | 0.527         | 0.598         | 46.000           | 0.560         |              |  |
|                                   |                 |                   | Shading                           | 0.124         | 0.149            | 0.825         | 0.410         | 27.000           | 0.343         |              |  |
|                                   |                 |                   | Soil N                            | 0.054         | 0.114            | 0.472         | 0.637         | 32.000           | 0.339         |              |  |
|                                   |                 |                   | Host Abundance                    | 0.032         | 0.077            | 0.414         | 0.679         | 24.000           | 0.253         |              |  |
|                                   |                 |                   | Plant Biomass                     | -0.026        | 0.076            | 0.334         | 0.738         | 21.000           | 0.224         |              |  |
|                                   |                 |                   | Soil P                            | 0.009         | 0.051            | 0.167         | 0.867         | 16.000           | 0.145         |              |  |
|                                   |                 |                   | Precipitation                     | 0.003         | 0.065            | 0.045         | 0.965         | 14.000           | 0.133         |              |  |
|                                   |                 |                   | Plant Diversity                   | -0.003        | 0.037            | 0.084         | 0.933         | 12.000           | 0.123         |              |  |
|                                   |                 |                   | Temperature                       | 0.007         | 0.054            | 0.131         | 0.896         | 11.000           | 0.107         |              |  |
|                                   |                 |                   |                                   | Conditional   | <b>Intercept</b> | <b>2.001</b>  | <b>0.065</b>  | <b>30.506</b>    | <b>0.000</b>  |              |  |
|                                   |                 |                   | <b>Pop. Fungal Diversity</b>      |               | <b>1.211</b>     | <b>0.142</b>  | <b>8.428</b>  | <b>0.000</b>     | <b>78.000</b> | <b>1.000</b> |  |
|                                   |                 |                   | Soil C:N                          |               | -0.146           | 0.110         | 1.314         | 0.189            | 46.000        | 0.560        |  |
|                                   | Shading         | 0.221             | 0.136                             |               | 1.614            | 0.107         | 27.000        | 0.343            |               |              |  |
|                                   | Soil N          | 0.160             | 0.147                             |               | 1.080            | 0.280         | 32.000        | 0.339            |               |              |  |
|                                   | Host Abundance  | 0.127             | 0.108                             |               | 1.170            | 0.242         | 24.000        | 0.253            |               |              |  |
|                                   | Plant Biomass   | -0.114            | 0.125                             |               | 0.904            | 0.366         | 21.000        | 0.224            |               |              |  |
|                                   | Soil P          | 0.069             | 0.129                             |               | 0.532            | 0.595         | 16.000        | 0.145            |               |              |  |
|                                   | Precipitation   | 0.022             | 0.176                             |               | 0.123            | 0.902         | 14.000        | 0.133            |               |              |  |
|                                   | Plant Diversity | -0.029            | 0.110                             |               | 0.265            | 0.791         | 12.000        | 0.123            |               |              |  |
|                                   | Temperature     | 0.049             | 0.135                             |               | 0.363            | 0.717         | 11.000        | 0.107            |               |              |  |
|                                   | Prokaryotes     | Full              | <b>Intercept</b>                  |               | <b>1.445</b>     | <b>0.073</b>  | <b>19.570</b> | <b>0.000</b>     |               |              |  |
|                                   |                 |                   | <b>Pop. Prokaryotic Diversity</b> | <b>1.286</b>  | <b>0.165</b>     | <b>7.721</b>  | <b>0.000</b>  | <b>26.000</b>    | <b>1.000</b>  |              |  |
|                                   |                 |                   | <b>Host Abundance</b>             | <b>-0.282</b> | <b>0.142</b>     | <b>1.976</b>  | <b>0.048</b>  | <b>26.000</b>    | <b>1.000</b>  |              |  |
|                                   |                 |                   | Plant Biomass                     | 0.496         | 0.124            | 3.963         | 0.000         | 24.000           | 0.943         |              |  |
| Plant Diversity                   |                 |                   | -0.071                            | 0.114         | 0.617            | 0.537         | 12.000        | 0.422            |               |              |  |
| Temperature                       |                 |                   | 0.065                             | 0.126         | 0.515            | 0.606         | 13.000        | 0.373            |               |              |  |
| Soil C:N                          |                 |                   | -0.006                            | 0.049         | 0.124            | 0.901         | 4.000         | 0.124            |               |              |  |
| Soil N                            |                 |                   | -0.004                            | 0.051         | 0.071            | 0.943         | 4.000         | 0.120            |               |              |  |
| Precipitation                     |                 |                   | -0.003                            | 0.054         | 0.047            | 0.962         | 4.000         | 0.118            |               |              |  |
| Soil P                            |                 |                   | -0.005                            | 0.055         | 0.084            | 0.933         | 4.000         | 0.117            |               |              |  |
| Shading                           |                 | -0.000            | 0.052                             | 0.004         | 0.997            | 4.000         | 0.113         |                  |               |              |  |
|                                   |                 | Conditional       | <b>Intercept</b>                  | <b>1.445</b>  | <b>0.073</b>     | <b>19.570</b> | <b>0.000</b>  |                  |               |              |  |
| <b>Pop. Prokaryotic Diversity</b> |                 |                   | <b>1.286</b>                      | <b>0.165</b>  | <b>7.721</b>     | <b>0.000</b>  | <b>26.000</b> | <b>1.000</b>     |               |              |  |
| <b>Host Abundance</b>             |                 |                   | <b>-0.299</b>                     | <b>0.127</b>  | <b>2.325</b>     | <b>0.020</b>  | <b>26.000</b> | <b>1.000</b>     |               |              |  |
| <b>Plant Biomass</b>              |                 |                   | <b>0.496</b>                      | <b>0.124</b>  | <b>3.963</b>     | <b>0.000</b>  | <b>24.000</b> | <b>0.943</b>     |               |              |  |
| Plant Diversity                   |                 |                   | -0.168                            | 0.121         | 1.372            | 0.170         | 12.000        | 0.422            |               |              |  |
| Temperature                       |                 |                   | 0.175                             | 0.153         | 1.135            | 0.257         | 13.000        | 0.373            |               |              |  |
| Soil C:N                          |                 |                   | -0.049                            | 0.131         | 0.375            | 0.708         | 4.000         | 0.124            |               |              |  |
| Soil N                            |                 |                   | -0.031                            | 0.147         | 0.211            | 0.833         | 4.000         | 0.120            |               |              |  |
| Precipitation                     |                 |                   | -0.022                            | 0.156         | 0.138            | 0.890         | 4.000         | 0.118            |               |              |  |
| Soil P                            | -0.040          |                   | 0.156                             | 0.252         | 0.801            | 4.000         | 0.117         |                  |               |              |  |
| Shading                           | -0.002          | 0.155             | 0.011                             | 0.991         | 4.000            | 0.113         |               |                  |               |              |  |

**Table S4.** Nutrient and herbivore effects on leaf-scale fungal and prokaryotic (bacteria and archaea) diversity. Results are based on mixed-effects models, and all tests are two tailed.

| Predictors            | Fungal Diversity                    |                |        | Prokaryotic Diversity               |                |        |
|-----------------------|-------------------------------------|----------------|--------|-------------------------------------|----------------|--------|
|                       | Estimates                           | Standard Error | p      | Estimates                           | Standard Error | p      |
| Intercept             | 1.841                               | 0.154          | <0.001 | 1.220                               | 0.187          | <0.001 |
| Nutrient              | 0.136                               | 0.069          | 0.048  | 0.144                               | 0.065          | 0.028  |
| Fence                 | 0.164                               | 0.071          | 0.021  | 0.076                               | 0.068          | 0.260  |
| Nutrient*Fence        | -0.180                              | 0.101          | 0.076  | -0.043                              | 0.096          | 0.652  |
| <b>Random Effects</b> |                                     |                |        |                                     |                |        |
| $\sigma^2$            | 0.2169                              |                |        | 0.1535                              |                |        |
| $\tau_{00}$           | 0.0370 <sub>plot:(block:site)</sub> |                |        | 0.0475 <sub>plot:(block:site)</sub> |                |        |
|                       | 0.0049 <sub>block:site</sub>        |                |        | 0.0867 <sub>block:site</sub>        |                |        |
|                       | 0.3411 <sub>site</sub>              |                |        | 0.4991 <sub>site</sub>              |                |        |
| Observations          | 515                                 |                |        | 515                                 |                |        |

**Table S5.** Nutrient and herbivore effects on the host community. Results are based on mixed-effects models, and all tests are two tailed.

| Predictors            | Plant Biomass                |                |                  | Shading                      |                |                  | Plant Diversity              |                |                  | Host Abundance               |                |                  |
|-----------------------|------------------------------|----------------|------------------|------------------------------|----------------|------------------|------------------------------|----------------|------------------|------------------------------|----------------|------------------|
|                       | Estimates                    | Standard Error | p                | Estimates                    | Standard Error | p                | Estimates                    | Standard Error | p                | Estimates                    | Standard Error | p                |
| <b>Intercept</b>      | <b>5.615</b>                 | <b>0.126</b>   | <b>&lt;0.001</b> | <b>0.667</b>                 | <b>0.048</b>   | <b>&lt;0.001</b> | <b>1.391</b>                 | <b>0.098</b>   | <b>&lt;0.001</b> | <b>-2.222</b>                | <b>0.353</b>   | <b>&lt;0.001</b> |
| <b>Nutrient</b>       | <b>0.469</b>                 | <b>0.051</b>   | <b>&lt;0.001</b> | <b>0.108</b>                 | <b>0.018</b>   | <b>&lt;0.001</b> | <b>-0.323</b>                | <b>0.045</b>   | <b>&lt;0.001</b> | <b>-0.509</b>                | <b>0.194</b>   | <b>0.009</b>     |
| <b>Fence</b>          | 0.063                        | 0.053          | 0.241            | 0.010                        | 0.019          | 0.609            | <b>-0.107</b>                | <b>0.046</b>   | <b>0.021</b>     | -0.146                       | 0.201          | 0.467            |
| <b>Nutrient*Fence</b> | -0.093                       | 0.076          | 0.223            | <b>0.083</b>                 | <b>0.027</b>   | <b>0.002</b>     | 0.016                        | 0.066          | 0.811            | -0.109                       | 0.286          | 0.704            |
| <b>Random Effects</b> |                              |                |                  |                              |                |                  |                              |                |                  |                              |                |                  |
| $\sigma^2$            | 0.1809                       |                |                  | 0.0228                       |                |                  | 0.1359                       |                |                  | 2.5683                       |                |                  |
| $\tau_{00}$           | 0.1163 <sub>block:site</sub> |                |                  | 0.0054 <sub>block:site</sub> |                |                  | 0.0657 <sub>block:site</sub> |                |                  | 0.6348 <sub>block:site</sub> |                |                  |
|                       | 0.1931 <sub>site</sub>       |                |                  | 0.0327 <sub>site</sub>       |                |                  | 0.1152 <sub>site</sub>       |                |                  | 1.4846 <sub>site</sub>       |                |                  |
| Observations          | 515                          |                |                  | 515                          |                |                  | 515                          |                |                  | 515                          |                |                  |

**Table S6.** Structural Equation Models (SEMs) linking nutrient addition and herbivore exclusion to changes in the plant community and microbiome diversity. The full model (Model 1) does not differ from the model in which all nutrient and herbivore effects were mediated through changes in the plant community (Model 2;  $p=0.2875$ ) or the most parsimonious model in which all effects are mediated through changes in shading (Model 3;  $p=0.181$ ). Double-headed arrows indicate relationships modeled as correlated errors. All tests are two-tailed.

**Model 1: Global goodness-of-fit: Fisher's C = 3.157;  $p= 0.206$  on 2 DF; AIC = 95.157**

| Response                     | Predictor                      | Estimate      | Standard Error | DF           | p            | Standard Estimate |
|------------------------------|--------------------------------|---------------|----------------|--------------|--------------|-------------------|
| <b>Host Abundance</b>        | ↔ <b>Nutrient</b>              | <b>-0.519</b> | <b>0.208</b>   | <b>496.7</b> | <b>0.013</b> | <b>-0.121</b>     |
| Host Abundance               | ↔ Fence                        | -0.107        | 0.214          | 497.2        | 0.617        | -0.025            |
| Host Abundance               | ↔ Nutrient:Fence               | -0.115        | 0.307          | 496.6        | 0.708        | -0.022            |
| <b>Plant Biomass</b>         | ↔ <b>Nutrient</b>              | <b>0.463</b>  | <b>0.061</b>   | <b>496.5</b> | <b>0.000</b> | <b>0.330</b>      |
| Plant Biomass                | ↔ Fence                        | 0.068         | 0.063          | 496.8        | 0.287        | 0.048             |
| Plant Biomass                | ↔ Nutrient:Fence               | -0.081        | 0.091          | 496.4        | 0.371        | -0.048            |
| <b>Shading</b>               | ↔ <b>Plant Biomass</b>         | <b>0.134</b>  | <b>0.013</b>   | <b>507.5</b> | <b>0.000</b> | <b>0.375</b>      |
| <b>Shading</b>               | ↔ <b>Nutrient</b>              | <b>0.044</b>  | <b>0.019</b>   | <b>497.5</b> | <b>0.020</b> | <b>0.088</b>      |
| Shading                      | ↔ Fence                        | 0.004         | 0.018          | 495.5        | 0.816        | 0.009             |
| <b>Shading</b>               | ↔ <b>Nutrient:Fence</b>        | <b>0.097</b>  | <b>0.026</b>   | <b>495.3</b> | <b>0.000</b> | <b>0.162</b>      |
| <b>Fungal Diversity</b>      | ↔ <b>Nutrient</b>              | <b>0.146</b>  | <b>0.066</b>   | <b>494.8</b> | <b>0.026</b> | <b>0.096</b>      |
| <b>Fungal Diversity</b>      | ↔ <b>Fence</b>                 | <b>0.172</b>  | <b>0.063</b>   | <b>492.6</b> | <b>0.006</b> | <b>0.112</b>      |
| Fungal Diversity             | ↔ Plant Biomass                | -0.032        | 0.050          | 506.2        | 0.515        | -0.030            |
| <b>Fungal Diversity</b>      | ↔ <b>Shading</b>               | <b>0.380</b>  | <b>0.151</b>   | <b>507.0</b> | <b>0.013</b> | <b>0.125</b>      |
| <b>Fungal Diversity</b>      | ↔ <b>Plant Diversity</b>       | <b>0.112</b>  | <b>0.056</b>   | <b>505.2</b> | <b>0.048</b> | <b>0.085</b>      |
| Fungal Diversity             | ↔ Host Abundance               | -0.010        | 0.013          | 503.4        | 0.444        | -0.029            |
| <b>Fungal Diversity</b>      | ↔ <b>Nutrient:Fence</b>        | <b>-0.215</b> | <b>0.091</b>   | <b>493.0</b> | <b>0.018</b> | <b>-0.118</b>     |
| Prokaryotic Diversity        | ↔ Nutrient                     | 0.089         | 0.066          | 494.2        | 0.178        | 0.051             |
| Prokaryotic Diversity        | ↔ Fence                        | 0.079         | 0.063          | 492.4        | 0.210        | 0.045             |
| Prokaryotic Diversity        | ↔ Plant Biomass                | 0.047         | 0.050          | 504.7        | 0.353        | 0.038             |
| <b>Prokaryotic Diversity</b> | ↔ <b>Shading</b>               | <b>0.384</b>  | <b>0.153</b>   | <b>506.3</b> | <b>0.013</b> | <b>0.111</b>      |
| Prokaryotic Diversity        | ↔ Plant Diversity              | 0.023         | 0.057          | 503.5        | 0.683        | 0.016             |
| Prokaryotic Diversity        | ↔ Host Abundance               | -0.022        | 0.013          | 501.6        | 0.096        | -0.055            |
| Prokaryotic Diversity        | ↔ Nutrient:Fence               | -0.085        | 0.091          | 492.8        | 0.354        | -0.041            |
| <b>Plant Diversity</b>       | ↔ <b>Shading</b>               | <b>-0.463</b> | <b>0.111</b>   | <b>504.6</b> | <b>0.000</b> | <b>-0.200</b>     |
| <b>Plant Diversity</b>       | ↔ <b>Nutrient</b>              | <b>-0.276</b> | <b>0.051</b>   | <b>498.5</b> | <b>0.000</b> | <b>-0.238</b>     |
| Plant Diversity              | ↔ Fence                        | -0.082        | 0.051          | 495.9        | 0.113        | -0.070            |
| Plant Diversity              | ↔ Nutrient:Fence               | 0.045         | 0.074          | 495.8        | 0.545        | 0.032             |
| <b>Fungal Diversity</b>      | ↔ <b>Prokaryotic Diversity</b> | <b>0.208</b>  | -              | <b>515.0</b> | <b>0.000</b> | <b>0.208</b>      |
| <b>Plant Diversity</b>       | ↔ <b>Plant Biomass</b>         | <b>-0.168</b> | -              | <b>515.0</b> | <b>0.000</b> | <b>-0.168</b>     |
| <b>Plant Diversity</b>       | ↔ <b>Host Abundance</b>        | <b>0.154</b>  | -              | <b>515.0</b> | <b>0.000</b> | <b>0.154</b>      |
| <b>Host Abundance</b>        | ↔ <b>Plant Biomass</b>         | <b>0.102</b>  | -              | <b>515.0</b> | <b>0.010</b> | <b>0.102</b>      |

| Response              | Marginal $r^2$ | Conditional $r^2$ |
|-----------------------|----------------|-------------------|
| Host Abundance        | 0.02           | 0.37              |
| Plant Biomass         | 0.09           | 0.51              |
| Shading               | 0.21           | 0.68              |
| Fungal Diversity      | 0.02           | 0.60              |
| Prokaryotic Diversity | 0.02           | 0.66              |
| Plant Diversity       | 0.12           | 0.49              |





**Model 2: Global goodness-of-fit: Fisher's C = 12.847; p= 0.232 on 10 DF; AIC = 92.847**

| Response                     |   | Predictor                    | Estimate      | Standard Error | DF           | p            | Standard Estimate |
|------------------------------|---|------------------------------|---------------|----------------|--------------|--------------|-------------------|
| <b>Host Abundance</b>        | ⇐ | <b>Nutrient</b>              | <b>-0.519</b> | <b>0.208</b>   | <b>496.7</b> | <b>0.013</b> | <b>-0.121</b>     |
| Host Abundance               | ⇐ | Fence                        | -0.107        | 0.214          | 497.2        | 0.617        | -0.025            |
| Host Abundance               | ⇐ | Nutrient:Fence               | -0.115        | 0.307          | 496.6        | 0.708        | -0.022            |
| <b>Plant Biomass</b>         | ⇐ | <b>Nutrient</b>              | <b>0.463</b>  | <b>0.061</b>   | <b>496.5</b> | <b>0.000</b> | <b>0.330</b>      |
| Plant Biomass                | ⇐ | Fence                        | 0.068         | 0.063          | 496.8        | 0.287        | 0.048             |
| Plant Biomass                | ⇐ | Nutrient:Fence               | -0.081        | 0.091          | 496.4        | 0.371        | -0.048            |
| <b>Shading</b>               | ⇐ | <b>Plant Biomass</b>         | <b>0.134</b>  | <b>0.013</b>   | <b>507.5</b> | <b>0.000</b> | <b>0.375</b>      |
| <b>Shading</b>               | ⇐ | <b>Nutrient</b>              | <b>0.044</b>  | <b>0.019</b>   | <b>497.5</b> | <b>0.020</b> | <b>0.088</b>      |
| Shading                      | ⇐ | Fence                        | 0.004         | 0.018          | 495.5        | 0.816        | 0.009             |
| <b>Shading</b>               | ⇐ | <b>Nutrient:Fence</b>        | <b>0.097</b>  | <b>0.026</b>   | <b>495.3</b> | <b>0.000</b> | <b>0.162</b>      |
| <b>Plant Diversity</b>       | ⇐ | <b>Shading</b>               | <b>-0.463</b> | <b>0.111</b>   | <b>504.6</b> | <b>0.000</b> | <b>-0.200</b>     |
| <b>Plant Diversity</b>       | ⇐ | <b>Nutrient</b>              | <b>-0.276</b> | <b>0.051</b>   | <b>498.5</b> | <b>0.000</b> | <b>-0.238</b>     |
| Plant Diversity              | ⇐ | Fence                        | -0.082        | 0.051          | 495.9        | 0.113        | -0.070            |
| Plant Diversity              | ⇐ | Nutrient:Fence               | 0.045         | 0.074          | 495.8        | 0.545        | 0.032             |
| Fungal Diversity             | ⇐ | Plant Biomass                | -0.016        | 0.049          | 509.4        | 0.751        | -0.014            |
| <b>Fungal Diversity</b>      | ⇐ | <b>Shading</b>               | <b>0.387</b>  | <b>0.145</b>   | <b>510.0</b> | <b>0.008</b> | <b>0.127</b>      |
| Fungal Diversity             | ⇐ | Plant Diversity              | 0.094         | 0.055          | 508.5        | 0.091        | 0.071             |
| Fungal Diversity             | ⇐ | Host Abundance               | -0.012        | 0.013          | 507.1        | 0.364        | -0.034            |
| Prokaryotic Diversity        | ⇐ | Plant Biomass                | 0.059         | 0.049          | 507.8        | 0.231        | 0.047             |
| <b>Prokaryotic Diversity</b> | ⇐ | <b>Shading</b>               | <b>0.413</b>  | <b>0.145</b>   | <b>508.9</b> | <b>0.005</b> | <b>0.119</b>      |
| Prokaryotic Diversity        | ⇐ | Plant Diversity              | 0.008         | 0.055          | 506.7        | 0.879        | 0.006             |
| Prokaryotic Diversity        | ⇐ | Host Abundance               | -0.024        | 0.013          | 505.1        | 0.069        | -0.060            |
| <b>Fungal Diversity</b>      | ⇔ | <b>Prokaryotic Diversity</b> | <b>0.215</b>  | -              | <b>515.0</b> | <b>0.000</b> | <b>0.215</b>      |
| <b>Plant Diversity</b>       | ⇔ | <b>Plant Biomass</b>         | <b>-0.168</b> | -              | <b>515.0</b> | <b>0.000</b> | <b>-0.168</b>     |
| <b>Plant Diversity</b>       | ⇔ | <b>Host Abundance</b>        | <b>0.154</b>  | -              | <b>515.0</b> | <b>0.000</b> | <b>0.154</b>      |
| <b>Host Abundance</b>        | ⇔ | <b>Plant Biomass</b>         | <b>0.102</b>  | -              | <b>515.0</b> | <b>0.010</b> | <b>0.102</b>      |

| Response              | Marginal r <sup>2</sup> | Conditional r <sup>2</sup> |
|-----------------------|-------------------------|----------------------------|
| Host Abundance        | 0.02                    | 0.37                       |
| Plant Biomass         | 0.09                    | 0.51                       |
| Shading               | 0.21                    | 0.68                       |
| Fungal Diversity      | 0.12                    | 0.49                       |
| Prokaryotic Diversity | 0.02                    | 0.59                       |
| Plant Diversity       | 0.02                    | 0.65                       |

**Model 3: Fisher's C = 28.712; p = 0.153 on 22 DF; AIC = 96.712**

| Response                     |   | Predictor                    | Estimate      | Standard Error | DF           | p            | Standard Estimate |
|------------------------------|---|------------------------------|---------------|----------------|--------------|--------------|-------------------|
| <b>Host Abundance</b>        | ⇐ | <b>Nutrient</b>              | <b>-0.519</b> | <b>0.208</b>   | <b>496.7</b> | <b>0.013</b> | <b>-0.121</b>     |
| Host Abundance               | ⇐ | Fence                        | -0.107        | 0.214          | 497.2        | 0.617        | -0.025            |
| Host Abundance               | ⇐ | Nutrient:Fence               | -0.115        | 0.307          | 496.6        | 0.708        | -0.022            |
| <b>Plant Biomass</b>         | ⇐ | <b>Nutrient</b>              | <b>0.463</b>  | <b>0.061</b>   | <b>496.5</b> | <b>0.000</b> | <b>0.330</b>      |
| Plant Biomass                | ⇐ | Fence                        | 0.068         | 0.063          | 496.8        | 0.287        | 0.048             |
| Plant Biomass                | ⇐ | Nutrient:Fence               | -0.081        | 0.091          | 496.4        | 0.371        | -0.048            |
| <b>Shading</b>               | ⇐ | <b>Plant Biomass</b>         | <b>0.134</b>  | <b>0.013</b>   | <b>507.5</b> | <b>0.000</b> | <b>0.375</b>      |
| <b>Shading</b>               | ⇐ | <b>Nutrient</b>              | <b>0.044</b>  | <b>0.019</b>   | <b>497.5</b> | <b>0.020</b> | <b>0.088</b>      |
| Shading                      | ⇐ | Fence                        | 0.004         | 0.018          | 495.5        | 0.816        | 0.009             |
| <b>Shading</b>               | ⇐ | <b>Nutrient:Fence</b>        | <b>0.097</b>  | <b>0.026</b>   | <b>495.3</b> | <b>0.000</b> | <b>0.162</b>      |
| <b>Plant Diversity</b>       | ⇐ | <b>Shading</b>               | <b>-0.463</b> | <b>0.111</b>   | <b>504.6</b> | <b>0.000</b> | <b>-0.200</b>     |
| <b>Plant Diversity</b>       | ⇐ | <b>Nutrient</b>              | <b>-0.276</b> | <b>0.051</b>   | <b>498.5</b> | <b>0.000</b> | <b>-0.238</b>     |
| Plant Diversity              | ⇐ | Fence                        | -0.082        | 0.051          | 495.9        | 0.113        | -0.070            |
| Plant Diversity              | ⇐ | Nutrient:Fence               | 0.045         | 0.074          | 495.8        | 0.545        | 0.032             |
| <b>Fungal Diversity</b>      | ⇐ | <b>Shading</b>               | <b>0.302</b>  | <b>0.123</b>   | <b>512.1</b> | <b>0.015</b> | <b>0.099</b>      |
| <b>Prokaryotic Diversity</b> | ⇐ | <b>Shading</b>               | <b>0.514</b>  | <b>0.124</b>   | <b>509.7</b> | <b>0.000</b> | <b>0.148</b>      |
| <b>Fungal Diversity</b>      | ⇔ | <b>Prokaryotic Diversity</b> | <b>0.214</b>  | -              | <b>515.0</b> | <b>0.000</b> | <b>0.214</b>      |
| <b>Plant Diversity</b>       | ⇔ | <b>Plant Biomass</b>         | <b>-0.168</b> | -              | <b>515.0</b> | <b>0.000</b> | <b>-0.168</b>     |
| <b>Plant Diversity</b>       | ⇔ | <b>Host Abundance</b>        | <b>0.154</b>  | -              | <b>515.0</b> | <b>0.000</b> | <b>0.154</b>      |
| <b>Host Abundance</b>        | ⇔ | <b>Plant Biomass</b>         | <b>0.102</b>  | -              | <b>515.0</b> | <b>0.010</b> | <b>0.102</b>      |

| Response              | Marginal $r^2$ | Conditional $r^2$ |
|-----------------------|----------------|-------------------|
| Host Abundance        | 0.02           | 0.37              |
| Plant Biomass         | 0.09           | 0.51              |
| Shading               | 0.21           | 0.68              |
| Fungal Diversity      | 0.12           | 0.49              |
| Prokaryotic Diversity | 0.01           | 0.57              |
| Plant Diversity       | 0.02           | 0.66              |
